# Supplementary material for: A parallelized molecular collision cross section package with optimized accuracy and efficiency
Source: Royal Society of Chemistry journal article supplement (doi:10.1039/c8an02150c), 2019-01-01
Supplement: c8an02150c1.xlsx [file c8an02150c1.xlsx]

## Sheet: TestCompounds
Species	InChI Key	Kingdom	Superclass	Class	Subclass	Parent Level 1	Parent Level 2	Parent Level 3		Superclass	Number of compounds
Amifostine	JKOQGQFVAUAYPM-UHFFFAOYSA-N	Organic compounds	Organophosphorus compounds	Organothiophosphorus compounds		Organothiophosphorus compounds				Benzenoids	19
Azamethiphos	VNKBTWQZTQIWDV-UHFFFAOYSA-N	Organic compounds	Organoheterocyclic compounds	Oxazolopyridines		Oxazolopyridines				Lipids and lipid-like molecules	1
Benthiavalicarb	VVSLYIKSEBPRSN-PELKAZGASA-N	Organic compounds	Organic acids and derivatives	Carboxylic acids and derivatives	Amino acids, peptides, and analogues	Amino acids and derivatives	Alpha amino acids and derivatives	Valine and derivatives		Organic acids and derivatives	10
(R)Bromchlorbuterol	OWADKUMVZPHSHB-UHFFFAOYSA-N	Organic compounds	Benzenoids	Benzene and substituted derivatives	Aniline and substituted anilines	2-bromoanilines				Organic nitrogen compounds	1
(R)Bromuconazol	HJJVPARKXDDIQD-UHFFFAOYSA-N	Organic compounds	Benzenoids	Benzene and substituted derivatives	Halobenzenes	Chlorobenzenes	Dichlorobenzenes			Organic oxygen compounds	1
Buprofezin	PRLVTUNWOQKEAI-UHFFFAOYSA-N	Organic compounds	Organoheterocyclic compounds	Thiadiazinanes		Thiadiazinanes				Organoheterocyclic compounds	14
Butafenacil	JEDYYFXHPAIBGR-UHFFFAOYSA-N	Organic compounds	Benzenoids	Benzene and substituted derivatives	Benzoic acids and derivatives	Benzoic acid esters				Organophosphorus compounds	3
Carboxin	GYSSRZJIHXQEHQ-UHFFFAOYSA-N	Organic compounds	Benzenoids	Benzene and substituted derivatives	Anilides	Anilides				Organosulfur compounds	1
Chlorantraniliprole	PSOVNZZNOMJUBI-UHFFFAOYSA-N	Organic compounds	Organoheterocyclic compounds	Pyridines and derivatives	Pyrazolylpyridines	Pyrazolylpyridines
Chlorbromuron	NLYNUTMZTCLNOO-UHFFFAOYSA-N	Organic compounds	Benzenoids	Benzene and substituted derivatives	N-phenylureas	N-phenylureas
(S)Chlormezanone	WEQAYVWKMWHEJO-UHFFFAOYSA-N	Organic compounds	Benzenoids	Benzene and substituted derivatives	Halobenzenes	Chlorobenzenes
Chlorpromazine	ZPEIMTDSQAKGNT-UHFFFAOYSA-N	Organic compounds	Organoheterocyclic compounds	Benzothiazines	Phenothiazines	Phenothiazines
Chlorpropamide	RKWGIWYCVPQPMF-UHFFFAOYSA-N	Organic compounds	Benzenoids	Benzene and substituted derivatives	Benzenesulfonamides	Benzenesulfonamides
Chlorprothixene	WSPOMRSOLSGNFJ-AUWJEWJLSA-N	Organic compounds	Organoheterocyclic compounds	Benzothiopyrans	1-benzothiopyrans	Thioxanthenes
Chlorsulfuron	VJYIFXVZLXQVHO-UHFFFAOYSA-N	Organic compounds	Organic nitrogen compounds	Organonitrogen compounds	Sulfonylureas	S-triazinyl-2-sulfonylureas
Clopidogrel	GKTWGGQPFAXNFI-HNNXBMFYSA-N	Organic compounds	Organic acids and derivatives	Carboxylic acids and derivatives	Amino acids, peptides, and analogues	Amino acids and derivatives	Alpha amino acids and derivatives	Alpha amino acid esters
Clothiandin	PGOOBECODWQEAB-UHFFFAOYSA-N	Organic compounds	Organoheterocyclic compounds	Azoles	Thiazoles	2,5-disubstituted thiazoles
Demeton-S-methyl-sulfone	PZIRJMYRYORVIT-UHFFFAOYSA-N	Organic compounds	Organosulfur compounds	Sulfonyls	Sulfones	Sulfones
Diafenoconazole	BQYJATMQXGBDHF-UHFFFAOYSA-N	Organic compounds	Benzenoids	Benzene and substituted derivatives	Diphenylethers	Diphenylethers
Diafenthiuron	WOWBFOBYOAGEEA-UHFFFAOYSA-N	Organic compounds	Benzenoids	Benzene and substituted derivatives	Diphenylethers	Diphenylethers
Diazinon	FHIVAFMUCKRCQO-UHFFFAOYSA-N	Organic compounds	Organic acids and derivatives	Organic thiophosphoric acids and derivatives	Thiophosphoric acid esters	Aryl thiophosphates	Pyrimidinyl phosphorothioates
Diazoxide	GDLBFKVLRPITMI-UHFFFAOYSA-N	Organic compounds	Organoheterocyclic compounds	Thiadiazines	Benzothiadiazines	1,2,4-benzothiadiazine-1,1-dioxides
Dichlorvos	OEBRKCOSUFCWJD-UHFFFAOYSA-N	Organic compounds	Organic acids and derivatives	Organic phosphoric acids and derivatives	Phosphate esters	Alkyl phosphates	Dialkyl phosphates
(E)Dimethomorph	QNBTYORWCCMPQP-NBVRZTHBSA-N	Organic compounds	Benzenoids	Benzene and substituted derivatives	Diphenylmethanes	Diphenylmethanes
Ethiprole	FNELVJVBIYMIMC-UHFFFAOYSA-N	Organic compounds	Organoheterocyclic compounds	Azoles	Pyrazoles	Phenylpyrazoles
Ethoprophos	VJYFKVYYMZPMAB-UHFFFAOYSA-N	Organic compounds	Organophosphorus compounds	Organothiophosphorus compounds		Organothiophosphorus compounds
Fenamiphos sulfone	LVNYJXIBJFXIRZ-UHFFFAOYSA-N	Organic compounds	Benzenoids	Benzene and substituted derivatives	Benzenesulfonyl compounds	Benzenesulfonyl compounds
Fipronil	ZOCSXAVNDGMNBV-UHFFFAOYSA-N	Organic compounds	Organoheterocyclic compounds	Azoles	Pyrazoles	Phenylpyrazoles
Flufenacet	IANUJLZYFUDJIH-UHFFFAOYSA-N	Organic compounds	Benzenoids	Benzene and substituted derivatives	Anilides	Anilides
Hexythiazox	XGWIJUOSCAQSSV-XHDPSFHLSA-N	Organic compounds	Benzenoids	Benzene and substituted derivatives	Halobenzenes	Chlorobenzenes
(R)Indapamide	NDDAHWYSQHTHNT-UHFFFAOYSA-N	Organic compounds	Benzenoids	Benzene and substituted derivatives	Benzenesulfonamides	Benzenesulfonamides
Indoxacarb	VBCVPMMZEGZULK-NRFANRHFSA-N	Organic compounds	Benzenoids	Benzene and substituted derivatives	Phenylcarbamic acid esters	Phenylcarbamic acid esters
Malaoxon	WSORODGWGUUOBO-UHFFFAOYSA-N	Organic compounds	Lipids and lipid-like molecules	Fatty Acyls	Fatty acid esters	Fatty acid esters
Mefenacet	XIGAUIHYSDTJHW-UHFFFAOYSA-N	Organic compounds	Organoheterocyclic compounds	Benzothiazoles		Benzothiazoles
Methamidophos	NNKVPIKMPCQWCG-UHFFFAOYSA-N	Organic compounds	Organophosphorus compounds	Organothiophosphorus compounds	Phosphoramidothioic-acid-O,S-diesters	Phosphoramidothioic-acid-O,S-diesters
Myclobutanil	HZJKXKUJVSEEFU-UHFFFAOYSA-N	Organic compounds	Benzenoids	Benzene and substituted derivatives	Halobenzenes	Chlorobenzenes
Novaluron	NJPPVKZQTLUDBO-UHFFFAOYSA-N	Organic compounds	Benzenoids	Phenol ethers		Phenol ethers
Omethoate	PZXOQEXFMJCDPG-UHFFFAOYSA-N	Organic compounds	Organic acids and derivatives	Carboxylic acids and derivatives	Carboxylic acid derivatives	Carboxylic acid amides	Secondary carboxylic acid amides
Phosphamidon	RGCLLPNLLBQHPF-HJWRWDBZSA-N	Organic compounds	Organic acids and derivatives	Organic phosphoric acids and derivatives	Phosphate esters	Alkyl phosphates	Dialkyl phosphates
Pirimiphos-methyl	QHOQHJPRIBSPCY-UHFFFAOYSA-N	Organic compounds	Organic acids and derivatives	Organic thiophosphoric acids and derivatives	Thiophosphoric acid esters	Aryl thiophosphates	Pyrimidinyl phosphorothioates
Prometryn	AAEVYOVXGOFMJO-UHFFFAOYSA-N	Organic compounds	Organoheterocyclic compounds	Triazines	1,3,5-triazines	Methylthio-s-triazines
Prosulfocarb	NQLVQOSNDJXLKG-UHFFFAOYSA-N	Organic compounds	Benzenoids	Benzene and substituted derivatives		Benzene and substituted derivatives
Pyridaben	DWFZBUWUXWZWKD-UHFFFAOYSA-N	Organic compounds	Benzenoids	Benzene and substituted derivatives	Phenylpropanes	Phenylpropanes
Sulfentrazone	OORLZFUTLGXMEF-UHFFFAOYSA-N	Organic compounds	Organoheterocyclic compounds	Azoles	Triazoles	Phenyltriazoles	Phenyl-1,2,4-triazoles
Temephos	WWJZWCUNLNYYAU-UHFFFAOYSA-N	Organic compounds	Organic acids and derivatives	Organic thiophosphoric acids and derivatives	Thiophosphoric acid esters	Aryl thiophosphates	Phenyl thiophosphates
Thiacloprid	HOKKPVIRMVDYPB-UHFFFAOYSA-N	Organic compounds	Organoheterocyclic compounds	Pyridines and derivatives	Halopyridines	2-halopyridines
Thiamethoxam	NWWZPOKUUAIXIW-DHZHZOJOSA-N	Organic compounds	Organoheterocyclic compounds	Azoles	Thiazoles	2,5-disubstituted thiazoles
Trichlorphon	NFACJZMKEDPNKN-UHFFFAOYSA-N	Organic compounds	Organic acids and derivatives	Organic phosphonic acids and derivatives	Phosphonic acid diesters	Dialkyl alkylphosphonates
Triclabendazole	NQPDXQQQCQDHHW-UHFFFAOYSA-N	Organic compounds	Organic oxygen compounds	Organooxygen compounds	Ethers	Diarylethers
Vamidothion	LESVOLZBIFDZGS-UHFFFAOYSA-N	Organic compounds	Organic acids and derivatives	Carboxylic acids and derivatives	Carboxylic acid derivatives	Carboxylic acid amides	Secondary carboxylic acid amides

## Sheet: CalibrationSet
Filename	InCHI key	Kingdom	Superclass	Class	Subclass	Parent Level 1	Parent Level 2	Parent Level 3	Parent Level 4		Superclass	Number of compounds
1,2,4,5-Benzenetetramine	ANUAIBBBDSEVKN-UHFFFAOYSA-N	Organic compounds	Benzenoids	Benzene and substituted derivatives	Aniline and substituted anilines	Aniline and substituted anilines					Alkaloids and derivatives	2
3H-1,2-Dithiole-3-Thione	LZENMJMJWQSSNJ-UHFFFAOYSA-N	Organic compounds	Organoheterocyclic compounds	Dithioles	1,2-dithioles	1,2-dithiole-3-thiones					Benzenoids	53
6,7-Dichloroquinoxaline-2,3-Diol	AVBSIKMUAFYZAV-UHFFFAOYSA-N	Organic compounds	Organoheterocyclic compounds	Diazanaphthalenes	Benzodiazines	Quinoxalines					Hydrocarbon derivatives	1
2-mercaptobenzothiazole	YXIWHUQXZSMYRE-UHFFFAOYSA-N	Organic compounds	Organoheterocyclic compounds	Benzothiazoles		Benzothiazoles					Lipids and lipid-like molecules	11
2-Phosphoglycerate	GXIURPTVHJPJLF-UHFFFAOYSA-N	Organic compounds	Organic oxygen compounds	Organooxygen compounds	Carbohydrates and carbohydrate conjugates	Sugar acids and derivatives					Organic acids and derivatives	9
3,4,5-Tribromopyridine	CWYVUHWKGWQPLP-UHFFFAOYSA-N	Organic compounds	Organoheterocyclic compounds	Pyridines and derivatives	Halopyridines	Polyhalopyridines					Organic nitrogen compounds	7
3-phosphoglycerate	OSJPPGNTCRNQQC-UHFFFAOYSA-N	Organic compounds	Organic oxygen compounds	Organooxygen compounds	Carbohydrates and carbohydrate conjugates	Sugar acids and derivatives					Organic oxygen compounds	9
4-Aminosalicylic Acid (N-protonated)	WUBBRNOQWQTFEX-UHFFFAOYSA-N	Organic compounds	Benzenoids	Benzene and substituted derivatives	Benzoic acids and derivatives	Hydroxybenzoic acid derivatives	Salicylic acid and derivatives	Aminosalicylic acids and derivatives	Aminosalicylic acids		Organoheterocyclic compounds	65
4-Aminosalicylic Acid (O-protonated)	WUBBRNOQWQTFEX-UHFFFAOYSA-N	Organic compounds	Benzenoids	Benzene and substituted derivatives	Benzoic acids and derivatives	Hydroxybenzoic acid derivatives	Salicylic acid and derivatives	Aminosalicylic acids and derivatives	Aminosalicylic acids		Phenylpropanoids and polyketides	5
5,7-Dichloroquinolin-8-Ol	WDFKMLRRRCGAKS-UHFFFAOYSA-N	Organic compounds	Organoheterocyclic compounds	Quinolines and derivatives	Haloquinolines	Chloroquinolines
9,9-Dimethyl-9,10-Dihydroacridine	JSEQNGYLWKBMJI-UHFFFAOYSA-N	Organic compounds	Organoheterocyclic compounds	Quinolines and derivatives	Benzoquinolines	Acridines
9(10H)-Acridone	FZEYVTFCMJSGMP-UHFFFAOYSA-N	Organic compounds	Organoheterocyclic compounds	Quinolines and derivatives	Benzoquinolines	Acridines	Acridones
Acetaminophen	RZVAJINKPMORJF-UHFFFAOYSA-N	Organic compounds	Benzenoids	Phenols	1-hydroxy-2-unsubstituted benzenoids	1-hydroxy-2-unsubstituted benzenoids
Acetohexamide	VGZSUPCWNCWDAN-UHFFFAOYSA-N	Organic compounds	Organic oxygen compounds	Organooxygen compounds	Carbonyl compounds	Ketones	Aryl ketones	Phenylketones	Alkyl-phenylketones
ACETYLCHOLINE.log	OIPILFWXSMYKGL-UHFFFAOYSA-N	Organic compounds	Organic nitrogen compounds	Organonitrogen compounds	Quaternary ammonium salts	Cholines	Acyl cholines
Albendazole	HXHWSAZORRCQMX-UHFFFAOYSA-N	Organic compounds	Organoheterocyclic compounds	Benzimidazoles	2-benzimidazolylcarbamic acid esters	2-benzimidazolylcarbamic acid esters
Alprendolol	PAZJSJFMUHDSTF-UHFFFAOYSA-N	Organic compounds	Benzenoids	Phenol ethers		Phenol ethers
Amantadine	DKNWSYNQZKUICI-UHFFFAOYSA-N	Organic compounds	Organic nitrogen compounds	Organonitrogen compounds	Amines	Primary amines	Monoalkylamines
Ambroxol	JBDGDEWWOUBZPM-UHFFFAOYSA-N	Organic compounds	Benzenoids	Benzene and substituted derivatives	Phenylmethylamines	Phenylmethylamines
Aminothiazole	RAIPHJJURHTUIC-UHFFFAOYSA-N	Organic compounds	Organoheterocyclic compounds	Azoles	Thiazoles	Thiazoles
Amiodarone	IYIKLHRQXLHMJQ-UHFFFAOYSA-N	Organic compounds	Organic oxygen compounds	Organooxygen compounds	Carbonyl compounds	Ketones	Aryl ketones	Phenylketones	Aryl-phenylketones
Amodiaquine	OVCDSSHSILBFBN-UHFFFAOYSA-N	Organic compounds	Organoheterocyclic compounds	Quinolines and derivatives	Aminoquinolines and derivatives	4-aminoquinolines
Amoxapine	QWGDMFLQWFTERH-UHFFFAOYSA-N	Organic compounds	Organoheterocyclic compounds	Benzoxazepines	Dibenzoxazepines	Dibenzoxazepines
Anagrelide	OTBXOEAOVRKTNQ-UHFFFAOYSA-N	Organic compounds	Organoheterocyclic compounds	Diazanaphthalenes	Benzodiazines	Quinazolines
Azelastine	MBUVEWMHONZEQD-UHFFFAOYSA-N	Organic compounds	Organoheterocyclic compounds	Diazanaphthalenes	Benzodiazines	Phthalazines	Phthalazinones
Beclamide	JPYQFYIEOUVJDU-UHFFFAOYSA-N	Organic compounds	Benzenoids	Benzene and substituted derivatives		Benzene and substituted derivatives
Benzbromarone	WHQCHUCQKNIQEC-UHFFFAOYSA-N	Organic compounds	Organic oxygen compounds	Organooxygen compounds	Carbonyl compounds	Ketones	Aryl ketones	Phenylketones	Aryl-phenylketones
Betamethasone	UREBDLICKHMUKA-DVTGEIKXSA-N	Organic compounds	Lipids and lipid-like molecules	Steroids and steroid derivatives	Hydroxysteroids	21-hydroxysteroids
Betamethasone Phosphate	VQODGRNSFPNSQE-DVTGEIKXSA-N	Organic compounds	Lipids and lipid-like molecules	Steroids and steroid derivatives	Pregnane steroids	Gluco/mineralocorticoids, progestogins and derivatives
Bretylium	AAQOQKQBGPPFNS-UHFFFAOYSA-N	Organic compounds	Benzenoids	Benzene and substituted derivatives	Phenylmethylamines	Phenylmethylamines
Brombuterol	PLFUBWPEUSILSL-UHFFFAOYSA-N	Organic compounds	Benzenoids	Benzene and substituted derivatives	Aniline and substituted anilines	2-bromoanilines
Bromhexine	OJGDCBLYJGHCIH-UHFFFAOYSA-N	Organic compounds	Benzenoids	Benzene and substituted derivatives	Phenylmethylamines	Phenylmethylamines
Bromocriptine	OZVBMTJYIDMWIL-AYFBDAFISA-N	Organic compounds	Alkaloids and derivatives	Ergoline and derivatives	Lysergic acids and derivatives	Lysergamides
Bromopride	GIYAQDDTCWHPPL-UHFFFAOYSA-N	Organic compounds	Benzenoids	Phenol ethers	Aminophenyl ethers	Aminophenyl ethers
Bromperidol	RKLNONIVDFXQRX-UHFFFAOYSA-N	Organic compounds	Organic oxygen compounds	Organooxygen compounds	Carbonyl compounds	Ketones	Aryl ketones	Phenylketones	Alkyl-phenylketones
Brompheniramine	ZDIGNSYAACHWNL-UHFFFAOYSA-N	Organic compounds	Organoheterocyclic compounds	Pyridines and derivatives	Pheniramines	Pheniramines
Broxyquinoline	ZDASUJMDVPTNTF-UHFFFAOYSA-N	Organic compounds	Organoheterocyclic compounds	Quinolines and derivatives	Haloquinolines	Haloquinolines
Bupropion	SNPPWIUOZRMYNY-UHFFFAOYSA-N	Organic compounds	Organic oxygen compounds	Organooxygen compounds	Carbonyl compounds	Ketones	Aryl ketones	Phenylketones	Alkyl-phenylketones
Captopril	FAKRSMQSSFJEIM-RQJHMYQMSA-N	Organic compounds	Organic acids and derivatives	Carboxylic acids and derivatives	Amino acids, peptides, and analogues	Amino acids and derivatives	Alpha amino acids and derivatives	Proline and derivatives
Carbamazepine	FFGPTBGBLSHEPO-UHFFFAOYSA-N	Organic compounds	Organoheterocyclic compounds	Benzazepines	Dibenzazepines	Dibenzazepines
Carbazole	UJOBWOGCFQCDNV-UHFFFAOYSA-N	Organic compounds	Organoheterocyclic compounds	Indoles and derivatives	Carbazoles	Carbazoles
Carbimazole	CFOYWRHIYXMDOT-UHFFFAOYSA-N	Organic compounds	Organoheterocyclic compounds	Azoles	Imidazoles	Substituted imidazoles	Carbonylimidazoles
Carbinoxamine	OJFSXZCBGQGRNV-UHFFFAOYSA-N	Organic compounds	Benzenoids	Benzene and substituted derivatives	Benzylethers	Benzylethers
Celecoxib	RZEKVGVHFLEQIL-UHFFFAOYSA-N	Organic compounds	Organoheterocyclic compounds	Azoles	Pyrazoles	Phenylpyrazoles
Chlorcyclizine	WFNAKBGANONZEQ-UHFFFAOYSA-N	Organic compounds	Benzenoids	Benzene and substituted derivatives	Diphenylmethanes	Diphenylmethanes
Chlormadinone Acetate	QMBJSIBWORFWQT-DFXBJWIESA-N	Organic compounds	Lipids and lipid-like molecules	Steroids and steroid derivatives	Pregnane steroids	Gluco/mineralocorticoids, progestogins and derivatives
CHLOROGUANIDE	SSOLNOMRVKKSON-UHFFFAOYSA-N	Organic compounds	Organic nitrogen compounds	Organonitrogen compounds	Guanidines	Biguanides	Arylbiguanides	1-arylbiguanides
CHLOROPYRAMINE	ICKFFNBDFNZJSX-UHFFFAOYSA-N	Organic compounds	Benzenoids	Benzene and substituted derivatives	Benzylamines	2-benzylaminopyridines
CHLOROXINE	WDFKMLRRRCGAKS-UHFFFAOYSA-N	Organic compounds	Organoheterocyclic compounds	Quinolines and derivatives	Haloquinolines	Chloroquinolines
(+)-Chlorpheniramine	SOYKEARSMXGVTM-HNNXBMFYSA-N	Organic compounds	Organoheterocyclic compounds	Pyridines and derivatives	Pheniramines	Pheniramines
Chlortetracycline	DHPRQBPJLMKORJ-XRNKAMNCSA-N	Organic compounds	Phenylpropanoids and polyketides	Tetracyclines		Tetracyclines
Choline	DHPRQBPJLMKORJ-XRNKAMNCSA-N	Organic compounds	Phenylpropanoids and polyketides	Tetracyclines		Tetracyclines
Chloroacetoxyquinoline	JSJOTZXJKCXWQC-UHFFFAOYSA-N	Organic compounds	Organoheterocyclic compounds	Quinolines and derivatives	Haloquinolines	Chloroquinolines
CLEMIZOLE	CJXAEXPPLWQRFR-UHFFFAOYSA-N	Organic compounds	Organoheterocyclic compounds	Benzimidazoles		Benzimidazoles
Clenbuterol	STJMRWALKKWQGH-UHFFFAOYSA-N	Organic compounds	Benzenoids	Benzene and substituted derivatives	Halobenzenes	Chlorobenzenes	Dichlorobenzenes
Clobetasol 17-Propionate	CBGUOGMQLZIXBE-XGQKBEPLSA-N	Organic compounds	Lipids and lipid-like molecules	Steroids and steroid derivatives	Pregnane steroids	Gluco/mineralocorticoids, progestogins and derivatives
CLOFAZIMINE	WDQPAMHFFCXSNU-UHFFFAOYSA-N	Organic compounds	Organoheterocyclic compounds	Diazanaphthalenes	Benzodiazines	Quinoxalines	Phenazines and derivatives
Clofibric Acid	TXCGAZHTZHNUAI-UHFFFAOYSA-N	Organic compounds	Benzenoids	Benzene and substituted derivatives	Phenoxyacetic acid derivatives	Phenoxyacetic acid derivatives
CLOMIPRAMINE	GDLIGKIOYRNHDA-UHFFFAOYSA-N	Organic compounds	Organoheterocyclic compounds	Benzazepines	Dibenzazepines	Dibenzazepines
CLOPERASTINE	FLNXBVJLPJNOSI-UHFFFAOYSA-N	Organic compounds	Benzenoids	Benzene and substituted derivatives	Diphenylmethanes	Diphenylmethanes
Clopidol	ZDPIZLCVJAAHHR-UHFFFAOYSA-N	Organic compounds	Organoheterocyclic compounds	Pyridines and derivatives	Halopyridines	Polyhalopyridines
CLORGILINE	BTFHLQRNAMSNLC-UHFFFAOYSA-N	Organic compounds	Benzenoids	Benzene and substituted derivatives	Halobenzenes	Chlorobenzenes	Dichlorobenzenes
CLOXYQUIN	CTQMJYWDVABFRZ-UHFFFAOYSA-N	Organic compounds	Organoheterocyclic compounds	Quinolines and derivatives	Haloquinolines	Chloroquinolines
CLOZAPINE	ZUXABONWMNSFBN-UHFFFAOYSA-N	Organic compounds	Organoheterocyclic compounds	Benzodiazepines	Dibenzodiazepines	Dibenzodiazepines
Colchicine	IAKHMKGGTNLKSZ-INIZCTEOSA-N	Organic compounds	Hydrocarbon derivatives	Tropones		Tropones
Bromo-3-hydroxy-4-(succin-2-yl)-caryolane gamma-lactone	CWCXONZIEDNVKI-PQBTTZHESA-N	Organic compounds	Organoheterocyclic compounds	Lactones	Gamma butyrolactones	Gamma butyrolactones
Cyproterone 17-O-Acetate	UWFYSQMTEOIJJG-FDTZYFLXSA-N	Organic compounds	Lipids and lipid-like molecules	Steroids and steroid derivatives	Pregnane steroids	Gluco/mineralocorticoids, progestogins and derivatives
Dapsone	MQJKPEGWNLWLTK-UHFFFAOYSA-N	Organic compounds	Benzenoids	Benzene and substituted derivatives	Benzenesulfonyl compounds	Benzenesulfonyl compounds
Demeclocycline	GUXHBMASAHGULD-SEYHBJAFSA-N	Organic compounds	Phenylpropanoids and polyketides	Tetracyclines		Tetracyclines
DERACOXIB_1_g09.mout	WAZQAZKAZLXFMK-UHFFFAOYSA-N	Organic compounds	Organoheterocyclic compounds	Azoles	Pyrazoles	Phenylpyrazoles
Dexamethasone	UREBDLICKHMUKA-CXSFZGCWSA-N	Organic compounds	Lipids and lipid-like molecules	Steroids and steroid derivatives	Hydroxysteroids	21-hydroxysteroids
Dexamethasone Phosphate	VQODGRNSFPNSQE-CXSFZGCWSA-N	Organic compounds	Lipids and lipid-like molecules	Steroids and steroid derivatives	Pregnane steroids	Gluco/mineralocorticoids, progestogins and derivatives
Diatrizoic Acid	YVPYQUNUQOZFHG-UHFFFAOYSA-N	Organic compounds	Benzenoids	Benzene and substituted derivatives	Benzoic acids and derivatives	Halobenzoic acids and derivatives	Halobenzoic acids
Dichlorophene	MDNWOSOZYLHTCG-UHFFFAOYSA-N	Organic compounds	Benzenoids	Benzene and substituted derivatives	Diphenylmethanes	Diphenylmethanes
Dicrotophos	VEENJGZXVHKXNB-VOTSOKGWSA-N	Organic compounds	Organic acids and derivatives	Organic phosphoric acids and derivatives	Phosphate esters	Alkyl phosphates	Dialkyl phosphates
Diloxanide	GZZZSOOGQLOEOB-UHFFFAOYSA-N	Organic compounds	Benzenoids	Benzene and substituted derivatives	Anilides	Anilides
Duloxetine	ZEUITGRIYCTCEM-KRWDZBQOSA-N	Organic compounds	Benzenoids	Naphthalenes		Naphthalenes
Econazole	LEZWWPYKPKIXLL-UHFFFAOYSA-N	Organic compounds	Benzenoids	Benzene and substituted derivatives	Benzylethers	Benzylethers
EPINEPHRINE	UCTWMZQNUQWSLP-VIFPVBQESA-N	Organic compounds	Benzenoids	Phenols	Benzenediols	Catechols
ERYTHROSINE	RAGZEDHHTPQLAI-UHFFFAOYSA-L	Organic compounds	Organoheterocyclic compounds	Benzopyrans	1-benzopyrans	Dibenzopyrans	Xanthenes
Ethionamide	AEOCXXJPGCBFJA-UHFFFAOYSA-N	Organic compounds	Organoheterocyclic compounds	Pyridines and derivatives		Pyridines and derivatives
Ethoxzolamide	OUZWUKMCLIBBOG-UHFFFAOYSA-N	Organic compounds	Organoheterocyclic compounds	Benzothiazoles		Benzothiazoles
Eticlopride	AADCDMQTJNYOSS-LBPRGKRZSA-N	Organic compounds	Benzenoids	Benzene and substituted derivatives	Benzoic acids and derivatives	Hydroxybenzoic acid derivatives	Salicylic acid and derivatives	Salicylamides
Fenofibrate	YMTINGFKWWXKFG-UHFFFAOYSA-N	Organic compounds	Benzenoids	Benzene and substituted derivatives	Benzophenones	Benzophenones
Flufenamic Acid	LPEPZBJOKDYZAD-UHFFFAOYSA-N	Organic compounds	Benzenoids	Benzene and substituted derivatives	Benzoic acids and derivatives	Aminobenzoic acids and derivatives	Aminobenzoic acids
Fosfosal	FFKUDWZICMJVPA-UHFFFAOYSA-N	Organic compounds	Organic acids and derivatives	Organic phosphoric acids and derivatives	Phosphate esters	Aryl phosphates	Aryl phosphomonoesters	Phenyl phosphates
GANGALEOIDIN	RPHAAJGBADUATP-UHFFFAOYSA-N	Organic compounds	Phenylpropanoids and polyketides	Depsides and depsidones		Depsides and depsidones
Gliclazide	BOVGTQGAOIONJV-UHFFFAOYSA-N	Organic compounds	Benzenoids	Benzene and substituted derivatives	Benzenesulfonamides	Benzenesulfonamides
Glufosinate	IAJOBQBIJHVGMQ-UHFFFAOYSA-N	Organic compounds	Organic acids and derivatives	Carboxylic acids and derivatives	Amino acids, peptides, and analogues	Amino acids and derivatives	Alpha amino acids and derivatives	Alpha amino acids
Glyphosphate	XDDAORKBJWWYJS-UHFFFAOYSA-N	Organic compounds	Organic acids and derivatives	Carboxylic acids and derivatives	Amino acids, peptides, and analogues	Amino acids and derivatives	Alpha amino acids and derivatives
Griseofulvin	DDUHZTYCFQRHIY-RBHXEPJQSA-N	Organic compounds	Organoheterocyclic compounds	Benzofurans		Benzofurans
Guanabenz	WDZVGELJXXEGPV-YIXHJXPBSA-N	Organic compounds	Benzenoids	Benzene and substituted derivatives	Halobenzenes	Chlorobenzenes	Dichlorobenzenes
GUANFACINE	INJOMKTZOLKMBF-UHFFFAOYSA-N	Organic compounds	Benzenoids	Benzene and substituted derivatives	Halobenzenes	Chlorobenzenes	Dichlorobenzenes
Guanine	UYTPUPDQBNUYGX-UHFFFAOYSA-N	Organic compounds	Organoheterocyclic compounds	Imidazopyrimidines	Purines and purine derivatives	Purines and purine derivatives
HALCINONIDE	MUQNGPZZQDCDFT-JNQJZLCISA-N	Organic compounds	Lipids and lipid-like molecules	Steroids and steroid derivatives	Pregnane steroids	Gluco/mineralocorticoids, progestogins and derivatives
HALOPERIDOL	LNEPOXFFQSENCJ-UHFFFAOYSA-N	Organic compounds	Organic oxygen compounds	Organooxygen compounds	Carbonyl compounds	Ketones	Aryl ketones	Phenylketones	Alkyl-phenylketones
Hydrocortisone Phosphate	BGSOJVFOEQLVMH-VWUMJDOOSA-N	Organic compounds	Lipids and lipid-like molecules	Steroids and steroid derivatives	Pregnane steroids	Gluco/mineralocorticoids, progestogins and derivatives
INDOMETHACIN	CGIGDMFJXJATDK-UHFFFAOYSA-N	Organic compounds	Organoheterocyclic compounds	Indoles and derivatives	Benzoylindoles	Benzoylindoles
IODOQUINOL	UXZFQZANDVDGMM-UHFFFAOYSA-N	Organic compounds	Organoheterocyclic compounds	Quinolines and derivatives	Haloquinolines	Haloquinolines
IOPANICACID	OIRFJRBSRORBCM-UHFFFAOYSA-N	Organic compounds	Phenylpropanoids and polyketides	Phenylpropanoic acids		Phenylpropanoic acids
Ketotifen	ZCVMWBYGMWKGHF-UHFFFAOYSA-N	Organic compounds	Organoheterocyclic compounds	Cycloheptathiophenes		Cycloheptathiophenes
Leflunomide	VHOGYURTWQBHIL-UHFFFAOYSA-N	Organic compounds	Benzenoids	Benzene and substituted derivatives	Anilides	Aromatic anilides
LIOTHYRONINE	AUYYCJSJGJYCDS-LBPRGKRZSA-N	Organic compounds	Organic acids and derivatives	Carboxylic acids and derivatives	Amino acids, peptides, and analogues	Amino acids and derivatives	Alpha amino acids and derivatives	Phenylalanine and derivatives
LORATADINE	JCCNYMKQOSZNPW-UHFFFAOYSA-N	Organic compounds	Organoheterocyclic compounds	Benzocycloheptapyridines		Benzocycloheptapyridines
LOXAPINE	XJGVXQDUIWGIRW-UHFFFAOYSA-N	Organic compounds	Organoheterocyclic compounds	Benzoxazepines	Dibenzoxazepines	Dibenzoxazepines
MECLIZINE	OCJYIGYOJCODJL-UHFFFAOYSA-N	Organic compounds	Benzenoids	Benzene and substituted derivatives	Diphenylmethanes	Diphenylmethanes
MECLOFENAMATE	SBDNJUWAMKYJOX-UHFFFAOYSA-N	Organic compounds	Benzenoids	Benzene and substituted derivatives	Benzoic acids and derivatives	Aminobenzoic acids and derivatives	Aminobenzoic acids
MEFENAMIC_ACID_1.log	HYYBABOKPJLUIN-UHFFFAOYSA-N	Organic compounds	Benzenoids	Benzene and substituted derivatives	Benzoic acids and derivatives	Aminobenzoic acids and derivatives	Aminobenzoic acids
Mevalonic acid-5-phosphate	OKZYCXHTTZZYSK-UHFFFAOYSA-N	Organic compounds	Organic acids and derivatives	Organic phosphoric acids and derivatives	Phosphate esters	Alkyl phosphates	Monoalkyl phosphates
Meloxicam	ZRVUJXDFFKFLMG-UHFFFAOYSA-N	Organic compounds	Organoheterocyclic compounds	Benzothiazines		Benzothiazines
Methimazole	PMRYVIKBURPHAH-UHFFFAOYSA-N	Organic compounds	Organoheterocyclic compounds	Azolines	Imidazolines	Imidazolethiones
Methyl 2,6-Dichloronicotinate	IFVVGOJYWCHRCT-UHFFFAOYSA-N	Organic compounds	Organoheterocyclic compounds	Pyridines and derivatives	Pyridinecarboxylic acids and derivatives	Pyridinecarboxylic acids
Methylene Blue	CXKWCBBOMKCUKX-UHFFFAOYSA-M	Organic compounds	Organoheterocyclic compounds	Benzothiazines		Benzothiazines
Meticrane	FNQQBFNIYODEMB-UHFFFAOYSA-N	Organic compounds	Organoheterocyclic compounds	Thiochromanes		Thiochromanes
Metobromuron	WLFDQEVORAMCIM-UHFFFAOYSA-N	Organic compounds	Benzenoids	Benzene and substituted derivatives	N-phenylureas	N-phenylureas
METOCLOPRAMIDE	TTWJBBZEZQICBI-UHFFFAOYSA-N	Organic compounds	Benzenoids	Phenol ethers	Aminophenyl ethers	Aminophenyl ethers
N-Ethyl Aniline	OJGMBLNIHDZDGS-UHFFFAOYSA-N	Organic compounds	Organic nitrogen compounds	Organonitrogen compounds	Amines	Aralkylamines	Phenylalkylamines
Nicergoline	YSEXMKHXIOCEJA-FVFQAYNVSA-N	Organic compounds	Organoheterocyclic compounds	Quinolines and derivatives	Indoloquinolines	Indoloquinolines
Nicotine	SNICXCGAKADSCV-JTQLQIEISA-N	Organic compounds	Organoheterocyclic compounds	Pyridines and derivatives	Pyrrolidinylpyridines	Pyrrolidinylpyridines
Ondansetron	FELGMEQIXOGIFQ-UHFFFAOYSA-N	Organic compounds	Organoheterocyclic compounds	Indoles and derivatives	Carbazoles	Carbazoles
Oxfendazole	BEZZFPOZAYTVHN-UHFFFAOYSA-N	Organic compounds	Organoheterocyclic compounds	Benzimidazoles		Benzimidazoles
OXICONAZOLE	QRJJEGAJXVEBNE-HKOYGPOVSA-N	Organic compounds	Benzenoids	Benzene and substituted derivatives	Halobenzenes	Chlorobenzenes	Dichlorobenzenes
Pantoprazole	IQPSEEYGBUAQFF-UHFFFAOYSA-N	Organic compounds	Organoheterocyclic compounds	Benzimidazoles	Sulfinylbenzimidazoles	Sulfinylbenzimidazoles
Paraquat	INFDPOAKFNIJBF-UHFFFAOYSA-N	Organic compounds	Organoheterocyclic compounds	Pyridines and derivatives	Bipyridines and oligopyridines	Bipyridines and oligopyridines
Penfluridol	MDLAAYDRRZXJIF-UHFFFAOYSA-N	Organic compounds	Benzenoids	Benzene and substituted derivatives	Diphenylmethanes	Diphenylmethanes
Pergolide	YEHCICAEULNIGD-MZMPZRCHSA-N	Organic compounds	Organoheterocyclic compounds	Quinolines and derivatives	Indoloquinolines	Indoloquinolines
Phosphocholine	YHHSONZFOIEMCP-UHFFFAOYSA-O	Organic compounds	Organic nitrogen compounds	Organonitrogen compounds	Quaternary ammonium salts	Cholines	Phosphocholines
Piroxicam	QYSPLQLAKJAUJT-UHFFFAOYSA-N	Organic compounds	Organoheterocyclic compounds	Benzothiazines		Benzothiazines
Prednisolone Phosphate	JDOZJEUDSLGTLU-VWUMJDOOSA-N	Organic compounds	Lipids and lipid-like molecules	Steroids and steroid derivatives	Pregnane steroids	Gluco/mineralocorticoids, progestogins and derivatives
Probenecid	DBABZHXKTCFAPX-UHFFFAOYSA-N	Organic compounds	Benzenoids	Benzene and substituted derivatives	Benzenesulfonamides	Benzenesulfonamides
Promazine	ZGUGWUXLJSTTMA-UHFFFAOYSA-N	Organic compounds	Organoheterocyclic compounds	Benzothiazines	Phenothiazines	Phenothiazines
Proquinazid	FLVBXVXXXMLMOX-UHFFFAOYSA-N	Organic compounds	Organoheterocyclic compounds	Diazanaphthalenes	Benzodiazines	Quinazolines
Prothionamide	VRDIULHPQTYCLN-UHFFFAOYSA-N	Organic compounds	Organoheterocyclic compounds	Pyridines and derivatives		Pyridines and derivatives
Pyrimethamine	WKSAUQYGYAYLPV-UHFFFAOYSA-N	Organic compounds	Organoheterocyclic compounds	Diazines	Pyrimidines and pyrimidine derivatives	Aminopyrimidines and derivatives
Pyritinol	SIXLXDIJGIWWFU-UHFFFAOYSA-N	Organic compounds	Organoheterocyclic compounds	Pyridines and derivatives	Methylpyridines	Methylpyridines
Rebamipide	ALLWOAVDORUJLA-UHFFFAOYSA-N	Organic compounds	Benzenoids	Benzene and substituted derivatives	Benzoic acids and derivatives	Benzamides	Hippuric acids and derivatives	Hippuric acids
Reserpine	QEVHRUUCFGRFIF-MDEJGZGSSA-N	Organic compounds	Alkaloids and derivatives	Yohimbine alkaloids		Yohimbine alkaloids
Ritanserin	JUQLTPCYUFPYKE-UHFFFAOYSA-N	Organic compounds	Benzenoids	Benzene and substituted derivatives	Diphenylmethanes	Diphenylmethanes
Sertraline	VGKDLMBJGBXTGI-SJCJKPOMSA-N	Organic compounds	Benzenoids	Tetralins	Tametralines	Tametralines
sn-Glycero-3-phosphocholine	SUHOQUVVVLNYQR-MRVPVSSYSA-N	Organic compounds	Lipids and lipid-like molecules	Glycerophospholipids	Glycerophosphocholines	Glycerophosphocholines
Sulfacetamide	SKIVFJLNDNKQPD-UHFFFAOYSA-N	Organic compounds	Benzenoids	Benzene and substituted derivatives	Benzenesulfonamides	Aminobenzenesulfonamides
Sulfasalazine	OQANPHBRHBJGNZ-FYJGNVAPSA-N	Organic compounds	Benzenoids	Benzene and substituted derivatives	Benzenesulfonamides	Benzenesulfonamides
Sulfinpyrazone	MBGGBVCUIVRRBF-UHFFFAOYSA-N	Organic compounds	Benzenoids	Benzene and substituted derivatives	Phenyl sulfoxides	Phenyl sulfoxides
Sulindac	MLKXDPUZXIRXEP-MFOYZWKCSA-N	Organic compounds	Benzenoids	Indenes and isoindenes		Indenes and isoindenes
Sulmazole	XMFCOYRWYYXZMY-UHFFFAOYSA-N	Organic compounds	Organoheterocyclic compounds	Azoles	Imidazoles	Substituted imidazoles	Phenylimidazoles
(R)-Suprofen	MDKGKXOCJGEUJW-SECBINFHSA-N	Organic compounds	Organic oxygen compounds	Organooxygen compounds	Carbonyl compounds	Ketones	Aryl ketones	Phenylketones	Aryl-phenylketones
TCEP (Tris(2-Carboxyethyl)Phosphine)	PZBFGYYEXUXCOF-UHFFFAOYSA-N	Organic compounds	Organic acids and derivatives	Carboxylic acids and derivatives	Tricarboxylic acids and derivatives	Tricarboxylic acids and derivatives
Tenoxicam	LZNWYQJJBLGYLT-UHFFFAOYSA-N	Organic compounds	Organic acids and derivatives	Carboxylic acids and derivatives	Amino acids, peptides, and analogues	Amino acids and derivatives	Alpha amino acids and derivatives
Tetraethylammonium	CBXCPBUEXACCNR-UHFFFAOYSA-N	Organic compounds	Organic nitrogen compounds	Organonitrogen compounds	Quaternary ammonium salts	Tetraalkylammonium salts
Tetramethylammonium	QEMXHQIAXOOASZ-UHFFFAOYSA-N	Organic compounds	Organic nitrogen compounds	Organonitrogen compounds	Quaternary ammonium salts	Tetraalkylammonium salts
Tetramisole	HLFSDGLLUJUHTE-UHFFFAOYSA-N	Organic compounds	Organoheterocyclic compounds	Imidazothiazoles		Imidazothiazoles
THIABENDAZOLE_1_g09.mout	WJCNZQLZVWNLKY-UHFFFAOYSA-N	Organic compounds	Organoheterocyclic compounds	Benzimidazoles		Benzimidazoles
THIORIDAZINE_2_g09.mout	KLBQZWRITKRQQV-UHFFFAOYSA-N	Organic compounds	Organoheterocyclic compounds	Benzothiazines	Phenothiazines	Phenothiazines
Tiotixene	GFBKORZTTCHDGY-UWVJOHFNSA-N	Organic compounds	Organoheterocyclic compounds	Benzothiopyrans	1-benzothiopyrans	Thioxanthenes
Thymine	RWQNBRDOKXIBIV-UHFFFAOYSA-N	Organic compounds	Organoheterocyclic compounds	Diazines	Pyrimidines and pyrimidine derivatives	Hydroxypyrimidines
Tioxolone	SLYPOVJCSQHITR-UHFFFAOYSA-N	Organic compounds	Benzenoids	Phenols	1-hydroxy-2-unsubstituted benzenoids	1-hydroxy-2-unsubstituted benzenoids
Tolbutamine	JLRGJRBPOGGCBT-UHFFFAOYSA-N	Organic compounds	Benzenoids	Benzene and substituted derivatives	Benzenesulfonamides	Benzenesulfonamides
Tolfenamic acid	YEZNLOUZAIOMLT-UHFFFAOYSA-N	Organic compounds	Benzenoids	Benzene and substituted derivatives	Benzoic acids and derivatives	Aminobenzoic acids and derivatives	Aminobenzoic acids
Tolnaftate	FUSNMLFNXJSCDI-UHFFFAOYSA-N	Organic compounds	Benzenoids	Naphthalenes		Naphthalenes
Tolazamide	OUDSBRTVNLOZBN-UHFFFAOYSA-N	Organic compounds	Benzenoids	Benzene and substituted derivatives	Benzenesulfonamides	Benzenesulfonamides
Xylazine	BPICBUSOMSTKRF-UHFFFAOYSA-N	Organic compounds	Benzenoids	Benzene and substituted derivatives	Xylenes	m-Xylenes
Zoxazolamine	YGCODSQDUUUKIV-UHFFFAOYSA-N	Organic compounds	Organoheterocyclic compounds	Benzoxazoles		Benzoxazoles
