# Supplementary material for: A parallelized molecular collision cross section package with optimized accuracy and efficiency
Source: Royal Society of Chemistry journal article supplement (doi:10.1039/c8an02150c), 2019-01-01
Supplement: c8an02150c2.xlsx [file c8an02150c2.xlsx]

## Sheet: CalibrationSet
Chemical Entity	Formula	InCHI Key	Mass / Da	Experimental CCS / A^2	Boltzmann Weighted CCS / A^2	Avg MobCal St Dev / A^2	% Difference
1,2,4,5-Benzenetetramine	C6H10N4	ANUAIBBBDSEVKN-UHFFFAOYSA-N	139.05	123	125.39	0.781593	1.94309
3H-1,2-Dithiole-3-Thione	C3H2S3	LZENMJMJWQSSNJ-UHFFFAOYSA-N	134.939	120.447	114.03	0.945423	5.32778
6,7-Dichloroquinoxaline-2,3-Diol	C8H4Cl2N2O2	AVBSIKMUAFYZAV-UHFFFAOYSA-N	230.972	142.98	138.53	2.19265	3.11253
2-mercaptobenzothiazole	C7H5NS2	YXIWHUQXZSMYRE-UHFFFAOYSA-N	167.994	126.414	124.99	1.40136	1.12629
2-Phosphoglycerate	C3H6O7P	GXIURPTVHJPJLF-UHFFFAOYSA-N	184.984	127.65	129.717	1.01374	1.61958
3,4,5-Tribromopyridine	C5H2Br3N	CWYVUHWKGWQPLP-UHFFFAOYSA-N	313.78	132.3	129.21	1.05521	2.3356
3-phosphoglycerate	C3H6O7P	OSJPPGNTCRNQQC-UHFFFAOYSA-N	184.984	125.6	129.719	1.15934	3.27925
4-Aminosalicylic Acid (N-protonated)	C7H7NO3	WUBBRNOQWQTFEX-UHFFFAOYSA-N	154.05	139.2	137.85	1.74849	0.969828
4-Aminosalicylic Acid (O-protonated)	C7H7NO3	WUBBRNOQWQTFEX-UHFFFAOYSA-N	154.05	126.2	123.55	1.0191	2.09984
5,7-Dichloroquinolin-8-ol	C9H5Cl2NO	WDFKMLRRRCGAKS-UHFFFAOYSA-N	213.98	133	131.33	1.37345	1.25564
9,9-Dimethyl-9,10-Dihydroacridine	C15H15N	JSEQNGYLWKBMJI-UHFFFAOYSA-N	210.13	145	142.76	1.36895	1.54483
9(10H)-Acridone	C13H9NO	FZEYVTFCMJSGMP-UHFFFAOYSA-N	196.08	134.6	132.88	1.05181	1.27786
Acetaminophen	C8H9NO2	RZVAJINKPMORJF-UHFFFAOYSA-N	152.1	131.1	130.246	1.03863	0.651632
Acetohexamide	C15H20N2O4S	VGZSUPCWNCWDAN-UHFFFAOYSA-N	325.122	178.186	180.336	1.32632	1.20665
Acetylcholine	C7NH16O2+	OIPILFWXSMYKGL-UHFFFAOYSA-N	147.12	127.8	125.38	0.73415	1.89358
Albendazole	C12H15N3O2S	HXHWSAZORRCQMX-UHFFFAOYSA-N	266.096	161.991	162.81	1.68232	0.505673
Alprendolol	C15H24ClNO2	PAZJSJFMUHDSTF-UHFFFAOYSA-N	250.195	158.585	164.798	1.91952	3.91779
Amantadine	C10H17N	DKNWSYNQZKUICI-UHFFFAOYSA-N	152.14	136	129.97	1.14402	4.43382
Ambroxol	C13H18Br2N2O	JBDGDEWWOUBZPM-UHFFFAOYSA-N	376.986	171.039	167.039	1.92988	2.33872
Aminothiazole	C3H4N2S	RAIPHJJURHTUIC-UHFFFAOYSA-N	101.017	117.217	112.13	1.01658	4.3396
Amiodarone	C25H29I2NO3	IYIKLHRQXLHMJQ-UHFFFAOYSA-N	646.031	226.28	231.29	1.9819	2.21367
Amodiaquine	C20H22ClN3O	OVCDSSHSILBFBN-UHFFFAOYSA-N	356.152	191.937	190.489	2.1351	0.754177
Amoxapine	C17H16ClN3O	QWGDMFLQWFTERH-UHFFFAOYSA-N	314.106	171.19	171.13	1.31386	0.0348641
Anagrelide	C10H7Cl2N3O	OTBXOEAOVRKTNQ-UHFFFAOYSA-N	256.004	147.899	147.336	1.50201	0.380636
Azelastine	C22H24ClN3O	MBUVEWMHONZEQD-UHFFFAOYSA-N	382.168	192.697	196.792	1.84057	2.12506
Beclamide	C10H12ClNO	JPYQFYIEOUVJDU-UHFFFAOYSA-N	198.068	142.266	140.402	1.21477	1.30998
Benzbromarone	C17H12Br2O3	WHQCHUCQKNIQEC-UHFFFAOYSA-N	422.923	176.027	167.316	1.40572	4.94888
Betamethasone	C22H29FO5	UREBDLICKHMUKA-DVTGEIKXSA-N	392.2	189.6	182.59	1.84929	3.69726
Betamethasone Phosphate	C22H28FO8P	VQODGRNSFPNSQE-DVTGEIKXSA-N	472.166	201.103	196.095	2.07752	2.49045
Bretylium	C11H17BrN	AAQOQKQBGPPFNS-UHFFFAOYSA-N	243.062	140.573	137.18	1.32443	2.41355
Brombuterol	C12H18Br2N2O	PLFUBWPEUSILSL-UHFFFAOYSA-N	364.986	167	159.693	2.21731	4.37555
Bromhexine	C14H20Br2N2	OJGDCBLYJGHCIH-UHFFFAOYSA-N	375.007	168.519	161.606	1.41794	4.10236
Bromocriptine	C32H40BrN5O5	OZVBMTJYIDMWIL-AYFBDAFISA-N	654.229	244.447	254.432	2.18031	4.08469
Bromopride	C14H22BrN3O2	GIYAQDDTCWHPPL-UHFFFAOYSA-N	344.097	173.634	169.831	1.74139	2.19021
Bromperidol	C21H23BrFNO2	RKLNONIVDFXQRX-UHFFFAOYSA-N	420.097	194.931	192.58	2.31169	1.2062
Brompheniramine	C16H19BrN2	ZDIGNSYAACHWNL-UHFFFAOYSA-N	319.08	166.3	166.651	1.79693	0.210994
Broxyquinoline	C9H5Br2NO	ZDASUJMDVPTNTF-UHFFFAOYSA-N	301.881	137.698	133.95	1.23249	2.72177
Bupropion	C13H18ClNO	SNPPWIUOZRMYNY-UHFFFAOYSA-N	240.115	157.466	154.54	1.78061	1.85828
Captopril	C9H15NO3S	FAKRSMQSSFJEIM-RQJHMYQMSA-N	216.08	141.403	148.7	0.872988	5.16023
Carbamazepine	C15H12N2O	FFGPTBGBLSHEPO-UHFFFAOYSA-N	237.1	147	146.54	1.38307	0.312925
Carbazole	C12H9N	UJOBWOGCFQCDNV-UHFFFAOYSA-N	168.08	129.3	132.89	1.36239	2.77649
Carbimazole	C7H10N2O2S	CFOYWRHIYXMDOT-UHFFFAOYSA-N	187.054	134.362	129.61	1.2996	3.53692
Carbinoxamine	C16H19ClN2O	OJFSXZCBGQGRNV-UHFFFAOYSA-N	291.126	167.384	168.784	1.54838	0.836228
Celecoxib	C17H14F3N3O2S	RZEKVGVHFLEQIL-UHFFFAOYSA-N	382.083	186.121	187.98	1.46351	0.998744
Chlorcyclizine	C18H21ClN2	WFNAKBGANONZEQ-UHFFFAOYSA-N	301.147	173.374	173.926	1.96546	0.318677
Chlormadinone Acetate	C23H29ClO4	QMBJSIBWORFWQT-DFXBJWIESA-N	405.183	197.026	192.464	1.85108	2.31533
Chloroguanide	C11H16ClN5	SSOLNOMRVKKSON-UHFFFAOYSA-N	254.117	161.011	160.394	1.63361	0.383441
Chloropyramine	C16H20ClN3	ICKFFNBDFNZJSX-UHFFFAOYSA-N	290.142	167.934	170.285	1.70283	1.39958
Chloroxine	C9H5Cl2NO	WDFKMLRRRCGAKS-UHFFFAOYSA-N	213.982	134.26	131.635	1.22166	1.95456
(+)-Chlorpheniramine	C16H19ClN2	SOYKEARSMXGVTM-HNNXBMFYSA-N	275.131	163.461	162.21	1.13516	0.76512
Chlortetracycline	C22H23ClN2O8	DHPRQBPJLMKORJ-XRNKAMNCSA-N	479.122	197.802	200.48	1.72466	1.35391
Choline	C5H14NO+	DHPRQBPJLMKORJ-XRNKAMNCSA-N	104.108	115.4	111.63	0.880225	3.2669
Chloroacetoxyquinoline	C11H8ClNO2	JSJOTZXJKCXWQC-UHFFFAOYSA-N	222.032	141.089	135.97	1.10224	3.62789
Clemizole	C19H20ClN3	CJXAEXPPLWQRFR-UHFFFAOYSA-N	326.142	179.771	178.562	1.7307	0.672537
Clenbuterol	C12H18Cl2N2O	STJMRWALKKWQGH-UHFFFAOYSA-N	277.087	164.445	162.73	2.05137	1.04313
Clobetasol 17-Propionate	C25H32ClFO5	CBGUOGMQLZIXBE-XGQKBEPLSA-N	467.2	205.141	205.271	1.72003	0.0636381
Clofazimine	C27H22Cl2N4	WDQPAMHFFCXSNU-UHFFFAOYSA-N	473.13	216.787	218.1	1.89397	0.60548
Clofibric Acid	C10H11ClO3	TXCGAZHTZHNUAI-UHFFFAOYSA-N	215.047	146.585	144.89	1.78548	1.15623
Clomipramine	C19H23ClN2	GDLIGKIOYRNHDA-UHFFFAOYSA-N	315.162	173.234	170.654	1.19963	1.48922
Cloperastine	C20H24ClNO	FLNXBVJLPJNOSI-UHFFFAOYSA-N	330.162	180.414	184.435	1.52454	2.22871
Clopidol	C7H7Cl2NO	ZDPIZLCVJAAHHR-UHFFFAOYSA-N	191.998	131.206	125.08	1.16281	4.66908
Clorgiline	C13H15Cl2NO	BTFHLQRNAMSNLC-UHFFFAOYSA-N	272.06	157.014	156.328	2.08741	0.437028
Cloxyquin	C9H6ClNO	CTQMJYWDVABFRZ-UHFFFAOYSA-N	180.021	129.522	128.08	1.11414	1.11356
Clozapine	C18H19ClN4	ZUXABONWMNSFBN-UHFFFAOYSA-N	327.137	177.536	175.72	1.62713	1.02308
Colchicine	C22H25NO6	IAKHMKGGTNLKSZ-INIZCTEOSA-N	400.18	193.2	191.494	1.59025	0.882789
Bromo-3-hydroxy-4-(succin-2-yl)-caryolane gamma-lactone	C19H27BrO4	CWCXONZIEDNVKI-PQBTTZHESA-N	399.117	183.389	177.918	1.74958	2.98355
Cyproterone 17-O-Acetate	C24H29ClO4	UWFYSQMTEOIJJG-FDTZYFLXSA-N	417.183	199.368	194.264	1.93393	2.55977
Dapsone	C12H12N2O2S	MQJKPEGWNLWLTK-UHFFFAOYSA-N	249.069	151.709	151.01	1.81336	0.460846
Demeclocycline	C21H21ClN2O8	GUXHBMASAHGULD-SEYHBJAFSA-N	465.106	195.948	198.448	1.44278	1.27592
Deracoxib	C17H14F3N3O3S	WAZQAZKAZLXFMK-UHFFFAOYSA-N	398.078	189.861	190.72	1.85049	0.452548
Dexamethasone	C22H29FO5	UREBDLICKHMUKA-CXSFZGCWSA-N	392.2	190.7	184.14	2.08336	3.43996
Dexamethasone Phosphate	C22H30FO8P	VQODGRNSFPNSQE-CXSFZGCWSA-N	472.166	200.623	198.837	1.77637	0.890145
Diatrizoic Acid	C11H9I3N2O4	YVPYQUNUQOZFHG-UHFFFAOYSA-N	614.777	176.281	184.47	1.24504	4.64514
Dichlorophene	C13H10Cl2O2	MDNWOSOZYLHTCG-UHFFFAOYSA-N	269.013	147.403	158.287	1.1852	7.38402
Dicrotophos	C8H16NO5P	VEENJGZXVHKXNB-VOTSOKGWSA-N	238.084	149.8	146.556	1.05865	2.16567
Diloxanide	C14H11Cl2NO4	GZZZSOOGQLOEOB-UHFFFAOYSA-N	328.014	171.726	176.25	1.74807	2.63413
Duloxetine	C18H19NOS	ZEUITGRIYCTCEM-KRWDZBQOSA-N	298.126	168.852	173.05	1.54675	2.48613
Econazole	C18H15Cl3N2O	LEZWWPYKPKIXLL-UHFFFAOYSA-N	381.032	184.751	180.21	1.48726	2.45768
Epinephrine	C9H13NO3	UCTWMZQNUQWSLP-VIFPVBQESA-N	184.1	141.5	138.44	1.44518	2.16254
Erythrosine	C20H8I4O5	RAGZEDHHTPQLAI-UHFFFAOYSA-L	836.662	212.121	208.09	2.44392	1.89992
Ethionamide	C8H10N2S	AEOCXXJPGCBFJA-UHFFFAOYSA-N	167.064	135.814	132.574	1.26206	2.38536
Ethoxzolamide	C9H10N2O3S2	OUZWUKMCLIBBOG-UHFFFAOYSA-N	259.021	152.69	153.29	1.55227	0.392801
Eticlopride	C17H25ClN2O3	AADCDMQTJNYOSS-LBPRGKRZSA-N	341.163	181.535	184.3	1.51519	1.52327
Fenofibrate	C20H21ClO4	YMTINGFKWWXKFG-UHFFFAOYSA-N	361.12	190.511	194.394	2.02158	2.03837
Flufenamic Acid	C14H10F3NO2	LPEPZBJOKDYZAD-UHFFFAOYSA-N	282.07	156.1	157.334	0.921525	0.790601
Fosfosal	C7H7O6P	FFKUDWZICMJVPA-UHFFFAOYSA-N	217.998	138.434	133.233	1.14334	3.75723
Gangaleoidin	C18H14Cl2O7	RPHAAJGBADUATP-UHFFFAOYSA-N	413.019	186.415	182.44	1.36911	2.13223
Gliclazide	C15H21N3O3S	BOVGTQGAOIONJV-UHFFFAOYSA-N	324.138	177.975	177.156	1.69907	0.460236
Glufosinate	C5H12NO4P	IAJOBQBIJHVGMQ-UHFFFAOYSA-N	181.05	140.15	134.7	1.12592	3.88869
Glyphosphate	C3H8NO5P	XDDAORKBJWWYJS-UHFFFAOYSA-N	168.006	129.03	133.025	1.14784	3.09651
Griseofulvin	C17H17ClO6	DDUHZTYCFQRHIY-RBHXEPJQSA-N	353.079	178.628	181.987	1.90942	1.88049
Guanabenz	C8H8Cl2N4	WDZVGELJXXEGPV-YIXHJXPBSA-N	231.02	147.824	145.19	1.40563	1.78177
Guanfacine	C9H9Cl2N3O	INJOMKTZOLKMBF-UHFFFAOYSA-N	246.02	148.927	148.9	1.46042	0.0179279
Guanine	C5H5N5O	UYTPUPDQBNUYGX-UHFFFAOYSA-N	152.06	125.9	129.33	1.11869	2.72416
Halcinonide	C24H32ClFO5	MUQNGPZZQDCDFT-JNQJZLCISA-N	455.2	200.879	197.88	1.79066	1.49291
Haloperidol	C21H23ClFNO2	LNEPOXFFQSENCJ-UHFFFAOYSA-N	376.147	191.693	191.601	1.63639	0.0477316
Hydrocortisone Phosphate	C21H31O8P	BGSOJVFOEQLVMH-VWUMJDOOSA-N	442.176	200.147	194.824	2.41718	2.65982
Indomethacin	C19H16ClNO4	CGIGDMFJXJATDK-UHFFFAOYSA-N	358.084	179.039	182.45	1.53422	1.9049
Iodoquinol	C9H5I2NO	UXZFQZANDVDGMM-UHFFFAOYSA-N	397.853	143.729	135.35	1.57087	5.82957
Iopanoic Acid	C11H12I3NO2	OIRFJRBSRORBCM-UHFFFAOYSA-N	571.808	172.728	166.224	1.14241	3.76537
Ketotifen	C19H19NOS	ZCVMWBYGMWKGHF-UHFFFAOYSA-N	310.126	177.128	178.47	1.40676	0.757925
Leflunomide	C12H9F3N2O2	VHOGYURTWQBHIL-UHFFFAOYSA-N	271.07	153.7	155.397	1.73215	1.10438
Liothyronine	C15H12I3NO4	AUYYCJSJGJYCDS-LBPRGKRZSA-N	651.797	205.294	205.374	2.24857	0.0385796
Loratadine	C22H23ClN2O2	JCCNYMKQOSZNPW-UHFFFAOYSA-N	383.152	185.793	200.3	1.77985	7.80833
Loxapine	C22H24ClN3O5	XJGVXQDUIWGIRW-UHFFFAOYSA-N	328.122	176.383	173.99	1.56045	1.35675
Meclizine	C25H27ClN2	OCJYIGYOJCODJL-UHFFFAOYSA-N	391.194	205.732	211.83	1.88216	2.96408
Meclofenamic Acid	C14H10Cl2NO2	SBDNJUWAMKYJOX-UHFFFAOYSA-N	296.024	156.951	157.031	1.14122	0.0507797
Mefenamic acid	C15H15NO2	HYYBABOKPJLUIN-UHFFFAOYSA-N	242.12	150.9	151.532	1.17587	0.418694
Mevalonic acid-5-phosphate	C6H13O7P	OKZYCXHTTZZYSK-UHFFFAOYSA-N	227.033	140.02	147.308	1.25578	5.20493
Meloxicam	C14H12N3O4S2	ZRVUJXDFFKFLMG-UHFFFAOYSA-N	352.042	174.521	177.578	1.65929	1.75167
Methimazole	C4H6N2S	PMRYVIKBURPHAH-UHFFFAOYSA-N	115.032	117.235	113.923	1.05455	2.82438
Methyl 2,6-Dichloronicotinate	C7H5Cl2NO2	IFVVGOJYWCHRCT-UHFFFAOYSA-N	205.98	131.8	129.53	1.2557	1.72231
Methylene Blue	C16H18ClN3S	CXKWCBBOMKCUKX-UHFFFAOYSA-M	284.12	161.3	159.02	2.00063	1.41352
Meticrane	C10H13NO4S2	FNQQBFNIYODEMB-UHFFFAOYSA-N	276.036	159.406	154.42	1.33318	3.12761
Metobromuron	C9H11BrN2O2	WLFDQEVORAMCIM-UHFFFAOYSA-N	259.008	145.41	143.915	1.96484	1.02819
Metoclopramide	C14H22ClN3O2	TTWJBBZEZQICBI-UHFFFAOYSA-N	300.147	171.773	170.02	1.52403	1.02053
N-Ethyl Aniline	C8H11N	OJGMBLNIHDZDGS-UHFFFAOYSA-N	121.089	124.5	123.99	1.07184	0.409639
Nicergoline	C24H26BrN3O3	YSEXMKHXIOCEJA-FVFQAYNVSA-N	484.123	213.815	213.123	1.76015	0.323575
Nicotine	C10H14N2	SNICXCGAKADSCV-JTQLQIEISA-N	163.12	134	131.381	1.15063	1.95427
Ondansetron	C18H19N3O	FELGMEQIXOGIFQ-UHFFFAOYSA-N	294.2	172.7	165.632	1.45451	4.09262
Oxfendazole	C15H13N3O3S	BEZZFPOZAYTVHN-UHFFFAOYSA-N	316.075	174.059	173.519	2.06597	0.310235
OXICONAZOLE	C18H13Cl4N3O	QRJJEGAJXVEBNE-HKOYGPOVSA-N	427.989	193.083	191.79	1.53652	0.669691
Pantoprazole	C16H15F2N3O4S	IQPSEEYGBUAQFF-UHFFFAOYSA-N	384.082	183.358	181.787	1.83764	0.856901
Paraquat	C12H14N2+2	INFDPOAKFNIJBF-UHFFFAOYSA-N	93.06	205	203.04	2.2572	0.956098
Penfluridol	C28H27ClF5NO	MDLAAYDRRZXJIF-UHFFFAOYSA-N	524.177	219.11	216.074	1.84651	1.38536
Pergolide	C19H26N2S	YEHCICAEULNIGD-MZMPZRCHSA-N	315.189	177.396	176.36	1.93653	0.583916
Phosphocholine	C5H15NO4P+	YHHSONZFOIEMCP-UHFFFAOYSA-O	183.065	138.54	132.31	1.86147	4.4969
Piroxicam	C15H13N3O4S	QYSPLQLAKJAUJT-UHFFFAOYSA-N	332.07	170.677	174.07	2.0524	1.98802
Prednisolone Phosphate	C21H29O8P	JDOZJEUDSLGTLU-VWUMJDOOSA-N	440.16	197.771	192.668	2.40859	2.57994
Probenecid	C13H19NO4S	DBABZHXKTCFAPX-UHFFFAOYSA-N	286.111	161.436	165.38	1.25515	2.44306
Promazine	C17H20N2S	ZGUGWUXLJSTTMA-UHFFFAOYSA-N	285.142	161.363	158.94	1.57988	1.5013
Proquinazid	C14H17IN2O4	FLVBXVXXXMLMOX-UHFFFAOYSA-N	374.04	169.35	167.548	2.37007	1.06388
Prothionamide	C9H12N2S	VRDIULHPQTYCLN-UHFFFAOYSA-N	181.079	141.265	138.59	1.3871	1.89389
Pyrimethamine	C12H13ClN4	WKSAUQYGYAYLPV-UHFFFAOYSA-N	249.09	155.779	149.163	1.62032	4.24668
Pyritinol	C16H20N2O4S2	SIXLXDIJGIWWFU-UHFFFAOYSA-N	369.094	173.429	163.378	1.61735	5.79523
Rebamipide	C19H15ClN2O4	ALLWOAVDORUJLA-UHFFFAOYSA-N	371.079	185.014	190.98	1.72273	3.22461
Reserpine	C33H40N2O9	QEVHRUUCFGRFIF-MDEJGZGSSA-N	609.3	254.3	267.42	1.95978	5.15926
Ritanserin	C27H25F2N3OS	JUQLTPCYUFPYKE-UHFFFAOYSA-N	478.176	220.676	224.53	2.11786	1.74649
Sertraline	C17H17Cl2N	VGKDLMBJGBXTGI-SJCJKPOMSA-N	306.081	168.117	162.881	1.82602	3.11492
sn-Glycero-3-phosphocholine	C8H20NO6P	SUHOQUVVVLNYQR-MRVPVSSYSA-N	257.103	157.17	154.234	1.62389	1.8678
Sulfacetamide	C8H10N2O3S	SKIVFJLNDNKQPD-UHFFFAOYSA-N	215.048	146.916	141.84	1.43037	3.45481
Sulfasalazine	C18H14N4O5S	OQANPHBRHBJGNZ-FYJGNVAPSA-N	399.076	200.384	206.07	2.09391	2.83747
Sulfinpyrazone	C23H20N2O3S	MBGGBVCUIVRRBF-UHFFFAOYSA-N	405.127	193.452	203.53	1.61532	5.20971
Sulindac	C20H17FO3S	MLKXDPUZXIRXEP-MFOYZWKCSA-N	357.095	191.6	187.43	2.03375	2.17662
Sulmazole	C14H13N3O2S	XMFCOYRWYYXZMY-UHFFFAOYSA-N	288.08	166.385	168.441	1.73226	1.23575
(R)-Suprofen	C14H12O3S	MDKGKXOCJGEUJW-SECBINFHSA-N	261.058	157.205	156.53	1.52314	0.429157
TCEP (Tris(2-Carboxyethyl)Phosphine)	C6H12Cl3O4P	PZBFGYYEXUXCOF-UHFFFAOYSA-N	249.053	149.63	148.346	1.37989	0.858129
Tenoxicam	C13H11N3O4S2	LZNWYQJJBLGYLT-UHFFFAOYSA-N	338.026	169.813	172.93	1.7024	1.83582
Tetraethylammonium	C8H20N+	CBXCPBUEXACCNR-UHFFFAOYSA-N	130.16	122.2	119.81	1.12121	1.95581
Tetramethylammonium	C4H12N+	QEMXHQIAXOOASZ-UHFFFAOYSA-N	74.097	107.4	105.44	0.909652	1.82495
Tetramisole	C11H12N2S	HLFSDGLLUJUHTE-UHFFFAOYSA-N	205.079	143.969	138.11	1.12427	4.06933
Thiabendazole	C10H7N3S	WJCNZQLZVWNLKY-UHFFFAOYSA-N	202.043	137.689	135.57	1.28182	1.5391
Thioridazine	C21H26N2S2	KLBQZWRITKRQQV-UHFFFAOYSA-N	371.161	185.012	183.01	1.57259	1.08189
Tiotixene	C23H29N3O2S2	GFBKORZTTCHDGY-UWVJOHFNSA-N	444.177	201.895	200.794	2.01816	0.545366
Thymine	C5H6N2O2	RWQNBRDOKXIBIV-UHFFFAOYSA-N	127.05	119.5	117.707	0.956932	1.50016
Tioxolone	C7H4O3S	SLYPOVJCSQHITR-UHFFFAOYSA-N	168.995	130.166	124.274	0.598734	4.52616
Tolbutamine	C12H18N2O3S	JLRGJRBPOGGCBT-UHFFFAOYSA-N	271.111	161.869	167.78	1.65715	3.65182
Tolfenamic acid	C14H12ClNO2	YEZNLOUZAIOMLT-UHFFFAOYSA-N	262.063	155.565	154.23	1.48048	0.858028
Tolnaftate	C19H17NOS	FUSNMLFNXJSCDI-UHFFFAOYSA-N	308.11	173.639	178.441	1.7968	2.76558
Tolazamide	C14H21N3O3S	OUDSBRTVNLOZBN-UHFFFAOYSA-N	312.138	173.317	171.879	1.84753	0.829472
Xylazine	C12H16N2S	BPICBUSOMSTKRF-UHFFFAOYSA-N	221.111	147.822	146.91	1.40387	0.616686
Zoxazolamine	C7H5ClN2O	YGCODSQDUUUKIV-UHFFFAOYSA-N	169.016	129.708	130.27	1.47953	0.433327

## Sheet: ValidationSet
Chemical Entity	Molecular formula	InChI Key	Mass / Da	Experimental CCS / A^2	Boltzmannn Weighted CCS / A^2	Avg MobCal St Dev / A^2	% Difference
Amifostine	C5H15N2O3PS	JKOQGQFVAUAYPM-UHFFFAOYSA-N	215.061	146.922	138.754	1.2994	-5.55937
Azamethiphos	C9H10ClN2O5PS	VNKBTWQZTQIWDV-UHFFFAOYSA-N	324.981	160	160.86	1.87689	0.537501
Benthiavalicarb	C15H18FN3O3S	VVSLYIKSEBPRSN-PELKAZGASA-N	340.113	173.38	172.821	1.16712	-0.322189
(R)Bromchlorbuterol	C12H18BrClN2O	OWADKUMVZPHSHB-UHFFFAOYSA-N	321.036	165.2	158.931	1.55735	-3.79466
(R)Bromuconazol	C13H12BrCl2N3O	HJJVPARKXDDIQD-UHFFFAOYSA-N	375.961	171.1	168.342	1.0198	-1.61217
Buprofezin	C13H12BrCl2N3O	PRLVTUNWOQKEAI-UHFFFAOYSA-N	375.961	171.1	173.186	1.31355	1.21909
Butafenacil	C20H18ClF3N2O6	JEDYYFXHPAIBGR-UHFFFAOYSA-N	475.088	212.2	204.821	1.36364	-3.47734
Carboxin	C12H13NO2S	GYSSRZJIHXQEHQ-UHFFFAOYSA-N	236.074	149.35	145.576	1.45224	-2.52662
Chlorantraniliprole	C18H14BrCl2N5O2	PSOVNZZNOMJUBI-UHFFFAOYSA-N	481.978	198.3	199.328	0.889513	0.518537
Chlorbromuron	C9H10BrClN2O2	NLYNUTMZTCLNOO-UHFFFAOYSA-N	292.969	152.25	150.259	2.14197	-1.30757
(S)Chlormezanone	C11H12ClNO3S	WEQAYVWKMWHEJO-UHFFFAOYSA-N	274.03	158.198	158.747	0.755009	0.347032
Chlorpromazine	C17H19ClN2S	ZPEIMTDSQAKGNT-UHFFFAOYSA-N	319.103	169.765	166.99	1.00757	-1.63475
Chlorpropamide	C10H13ClN2O3S	RKWGIWYCVPQPMF-UHFFFAOYSA-N	277.041	158.493	161.95	1.17158	2.18138
Chlorprothixene	C18H18ClNS	WSPOMRSOLSGNFJ-AUWJEWJLSA-N	316.092	169.252	169	1.3071	-0.148698
Chlorsulfuron	C12H12ClN5O4S	VJYIFXVZLXQVHO-UHFFFAOYSA-N	358.037	175.29	180.122	1.52964	2.75656
Clopidogrel	C16H16ClNO2S	GKTWGGQPFAXNFI-HNNXBMFYSA-N	322.066	167.741	170.306	1.6024	1.52918
Clothiandin	C6H8ClN5O2S	PGOOBECODWQEAB-UHFFFAOYSA-N	250.016	153.2	151.719	0.679021	-0.966869
Demeton-S-methyl-sulfone	C6H15O5PS2	PZIRJMYRYORVIT-UHFFFAOYSA-N	263.017	143.66	144.34	0.961035	0.47334
Diafenoconazole	C19H17Cl2N3O3	BQYJATMQXGBDHF-UHFFFAOYSA-N	406.072	200.1	202.151	1.88674	1.02487
Diafenthiuron	C23H32N2OS	WOWBFOBYOAGEEA-UHFFFAOYSA-N	385.231	199.75	202.673	1.5291	1.46336
Diazinon	C12H21N2O3PS	FHIVAFMUCKRCQO-UHFFFAOYSA-N	305.108	173.5	174.027	1.441	0.303797
Diazoxide	C8H7ClN2O2S	GDLBFKVLRPITMI-UHFFFAOYSA-N	230.999	143.73	142.35	1.21172	-0.960097
Dichlorvos	C4H7Cl2O4P	OEBRKCOSUFCWJD-UHFFFAOYSA-N	220.953	133.07	133.365	1.05442	0.221759
(E)Dimethomorph	C21H22ClNO4	QNBTYORWCCMPQP-NBVRZTHBSA-N	388.131	200.6	197.145	1.22144	-1.72237
Ethiprole	C13H9Cl2F3N4OS	FNELVJVBIYMIMC-UHFFFAOYSA-N	396.99	183.7	180.91	2.03749	-1.51873
Ethoprophos	C8H19O2PS2	VJYFKVYYMZPMAB-UHFFFAOYSA-N	243.064	149.27	151.422	1.29806	1.44145
Fenamiphos sulfone	C13H22NO5PS	LVNYJXIBJFXIRZ-UHFFFAOYSA-N	336.103	179.48	180.81	2.04226	0.741031
Fipronil	C12H4Cl2F6N4OS	ZOCSXAVNDGMNBV-UHFFFAOYSA-N	436.946	180.77	179.439	1.45323	-0.73616
Flufenacet	C14H13F4N3O2S	IANUJLZYFUDJIH-UHFFFAOYSA-N	364.074	178.2	173.62	1.5698	-2.57018
Hexythiazox	C17H21ClN2O2S	XGWIJUOSCAQSSV-XHDPSFHLSA-N	353.108	185.5	180.033	0.763004	-2.94721
(R)Indapamide	C16H16ClN3O3S	NDDAHWYSQHTHNT-UHFFFAOYSA-N	366.067	184.63	185.638	1.19899	0.546466
Indoxacarb	C22H17ClF3N3O7	VBCVPMMZEGZULK-NRFANRHFSA-N	528.078	207.1	216.532	1.09257	4.55413
Malaoxon	C10H19O7PS	WSORODGWGUUOBO-UHFFFAOYSA-N	315.066	164.3	169.864	1.44826	3.38623
Mefenacet	C16H14N2O2S	XIGAUIHYSDTJHW-UHFFFAOYSA-N	299.085	168.6	166.42	1.55069	-1.29286
Methamidophos	C2H8NO2PS	NNKVPIKMPCQWCG-UHFFFAOYSA-N	142.009	124	116.66	0.875768	-5.91935
Myclobutanil	C15H17ClN4	HZJKXKUJVSEEFU-UHFFFAOYSA-N	289.122	174.6	176.143	1.07539	0.883803
Novaluron	C17H9ClF8N2O4	NJPPVKZQTLUDBO-UHFFFAOYSA-N	493.02	196.9	203.191	3.29177	3.19483
Omethoate	C5H12NO4PS	PZXOQEXFMJCDPG-UHFFFAOYSA-N	214.03	138.6	136.823	1.37524	-1.28231
Phosphamidon	C10H19ClNO5P	RGCLLPNLLBQHPF-HJWRWDBZSA-N	300.076	158.6	155.845	1.30017	-1.7371
Pirimiphos-methyl	C11H20N3O3PS	QHOQHJPRIBSPCY-UHFFFAOYSA-N	306.104	168.1	168.275	1.41285	0.103975
Prometryn	C10H19N5S	AAEVYOVXGOFMJO-UHFFFAOYSA-N	242.143	163.3	157.186	1.01786	-3.74423
Prosulfocarb	C14H21NOS	NQLVQOSNDJXLKG-UHFFFAOYSA-N	252.142	156.95	158.94	1.71138	1.26794
Pyridaben	C19H25ClN2OS	DWFZBUWUXWZWKD-UHFFFAOYSA-N	365.145	193.6	191.33	1.84966	-1.17252
Sulfentrazone	C11H10Cl2F2N4O3S	OORLZFUTLGXMEF-UHFFFAOYSA-N	386.989	173.63	172.566	0.996867	-0.613064
Temephos	C16H20O6P2S4	WWJZWCUNLNYYAU-UHFFFAOYSA-N	466.997	203.4	216.234	1.10047	6.3098
Thiacloprid	C10H9ClN4S	HOKKPVIRMVDYPB-UHFFFAOYSA-N	253.031	157.2	158.924	0.725346	1.09657
Thiamethoxam	C8H10ClN5O3S	NWWZPOKUUAIXIW-DHZHZOJOSA-N	292.027	160.3	157.102	1.53179	-1.99506
Trichlorphon	C4H8Cl3O4P	NFACJZMKEDPNKN-UHFFFAOYSA-N	256.93	136.12	134.26	0.939021	-1.36679
Triclabendazole	C14H9Cl3N2OS	NQPDXQQQCQDHHW-UHFFFAOYSA-N	358.957	179.333	177.97	2.14977	-0.759669
Vamidothion	C8H18NO4PS2	LESVOLZBIFDZGS-UHFFFAOYSA-N	288.049	158.8	156.346	1.36555	-1.54528
